# Supplementary material for: Flocking in complex environments—Attention trade-offs in collective information processing
Source: PubMed Central journal article supplement (PMC7173936; doi:10.1371/journal.pcbi.1007697), 2020-04-06
Supplement: pcbi.1007697.s007.pdf [file pcbi.1007697.s007.pdf]

SUPPLEMENTARY FIGURE 2

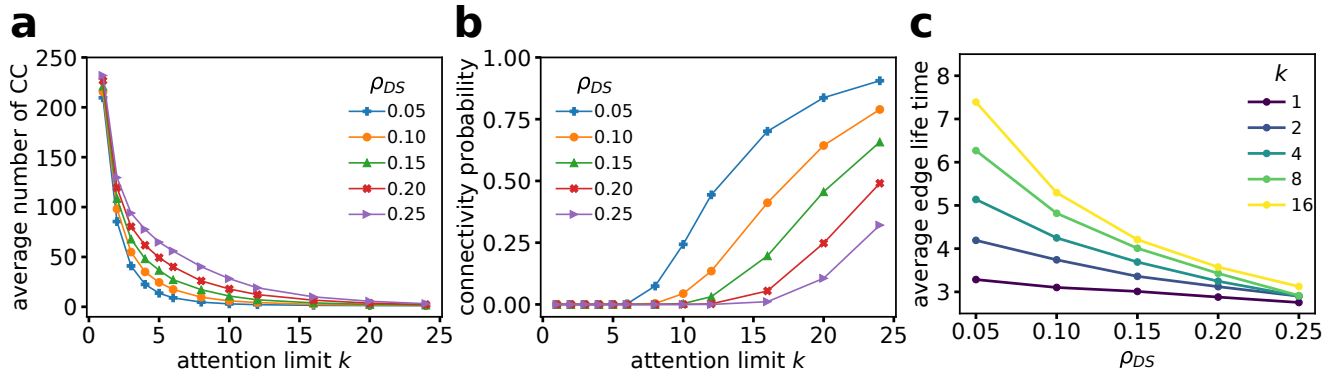

FIG. S2. Temporal interaction networks. **a:** Average number of connected components (CC) of the interaction network versus attention limit  $k$ . For all DS densities  $\rho_{DS}$ , we observe a fast decay of the number of connected components, which due to constant number of agents  $N$  is equivalent to the growth of the average connected component size, indicating a more tightly connected temporal network. **b:** The probability of observing one connected component during simulation. By increasing DS density, nonzero probability happens at larger  $k$  values. **c:** The average life time of an edge in the interaction network decreases with increasing density of DSs. However with increasing  $k$  for a fixed DS density, we observe longer life times due to increased connectivity in the interaction network.
