# Supplementary material for: Flocking in complex environments—Attention trade-offs in collective information processing
Source: PubMed Central journal article supplement (PMC7173936; doi:10.1371/journal.pcbi.1007697), 2020-04-06
Supplement: pcbi.1007697.s008.pdf [file pcbi.1007697.s008.pdf]

SUPPLEMENTARY FIGURE 3

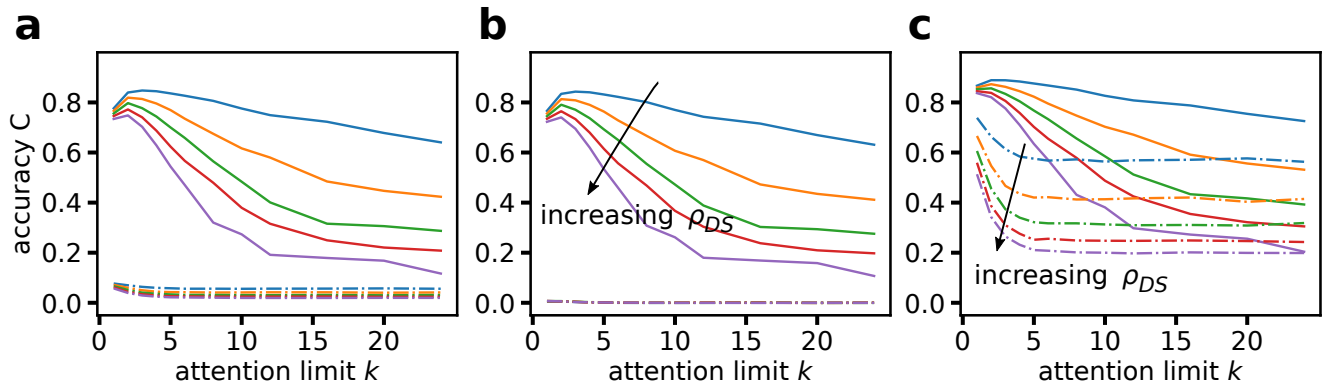

FIG. S3. Emergent collective behavior. Accuracy  $C$  vs attention limit  $k$  calculated for the whole system (a), uninformed individuals (b) and informed individuals (c). Solid lines are for the interacting system and dashed dotted lines are for the non-interacting system with  $\gamma_s = 0$ .
