# Supplementary material for: Flocking in complex environments—Attention trade-offs in collective information processing
Source: PubMed Central journal article supplement (PMC7173936; doi:10.1371/journal.pcbi.1007697), 2020-04-06
Supplement: pcbi.1007697.s009.pdf [file pcbi.1007697.s009.pdf]

SUPPLEMENTARY FIGURE 4

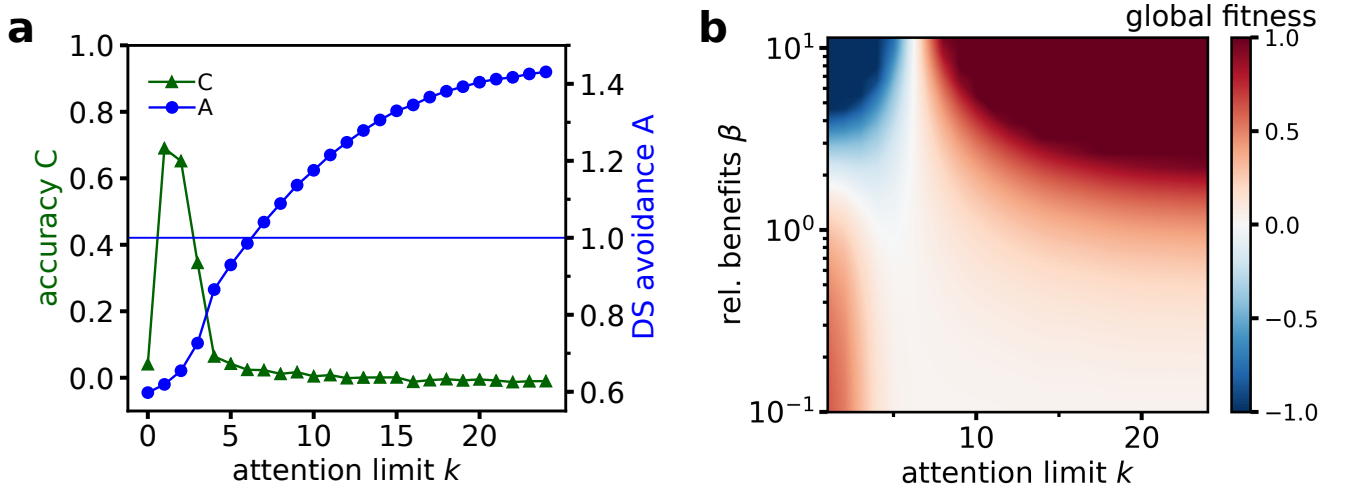

FIG. S4. Collective accuracy and DS avoidance in a structured environment with circular DS free path. **a**: Accuracy  $C$  (triangles) and normalized DS avoidance  $A$  (circles) versus attention limit  $k$ . The horizontal line,  $A = 1$ , corresponds to DS avoidance of non-interacting agents. For socially interacting agents with low  $k$  values ( $k = 1, 2$ ), we observe high accuracy  $C$  together with almost complete ignorance towards environmental cues. By increasing  $k$ , more agents start to sense the environment and react to DSs. At high  $k$ , the collective behavior is fully determined by the local environmental features: We observe collective rotation along the circular path and complete ignorance of the global migration direction accessible to informed individuals (see Supp. Movie S4). This trade-off is shown quantitatively by the global fitness function in panel **b** versus attention capacity  $k$  and relative DS avoidance benefit  $\beta$ . There are two maxima in global fitness, one for low  $k$ ,  $\beta \ll 1$ , showing migration accuracy to be beneficial for the group, the other at high  $k$ , and  $\beta > 1$ , which indicates higher benefits associated with DS avoidance in comparison to collective accuracy.
