# Supplementary material for: Flocking in complex environments—Attention trade-offs in collective information processing
Source: PubMed Central journal article supplement (PMC7173936; doi:10.1371/journal.pcbi.1007697), 2020-04-06
Supplement: pcbi.1007697.s010.pdf [file pcbi.1007697.s010.pdf]

SUPPLEMENTARY FIGURE 5

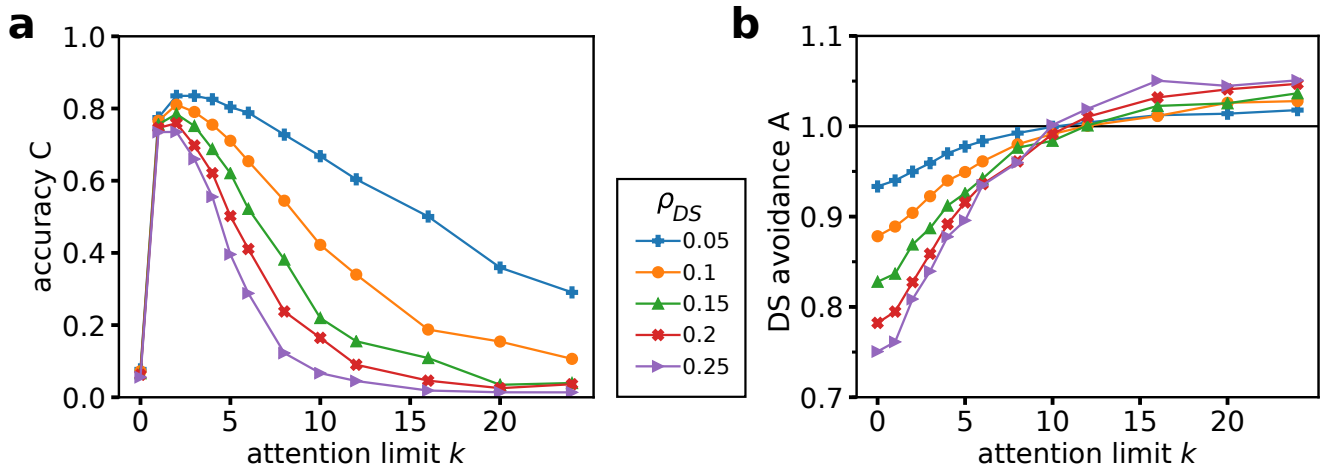

FIG. S5. Attention trade-off in a group of agents with active signalers. Each agent connected to another individual signalling direct interaction with a DS (direct responder), pays only attention to the signaller(s) and ignores other social cues. Accuracy  $C$  (a) and DS avoidance  $A$  (b) versus attention limit  $k$  for different DS densities at  $R_{inf} = 0.1$ .
