# Supplementary material for: Flocking in complex environments—Attention trade-offs in collective information processing
Source: PubMed Central journal article supplement (PMC7173936; doi:10.1371/journal.pcbi.1007697), 2020-04-06
Supplement: pcbi.1007697.s011.pdf [file pcbi.1007697.s011.pdf]

SUPPLEMENTARY FIGURE 6

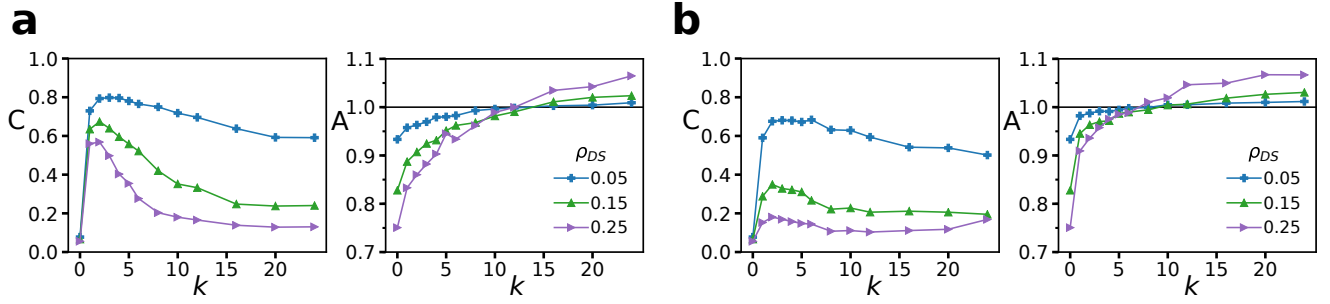

FIG. S6. Model extension with the priority of DS avoidance. Accuracy  $C$  and DS avoidance  $A$  vs attention limit  $k$  in a model where the agents first detect DSs with some probability and otherwise interact with their kNO. **a:**  $P_{direct} = 0.2$ , **b:**  $P_{direct} = 0.5$ .
