# Supplementary material for: Flocking in complex environments—Attention trade-offs in collective information processing
Source: PubMed Central journal article supplement (PMC7173936; doi:10.1371/journal.pcbi.1007697), 2020-04-06
Supplement: pcbi.1007697.s012.pdf [file pcbi.1007697.s012.pdf]

SUPPLEMENTARY FIGURE 7

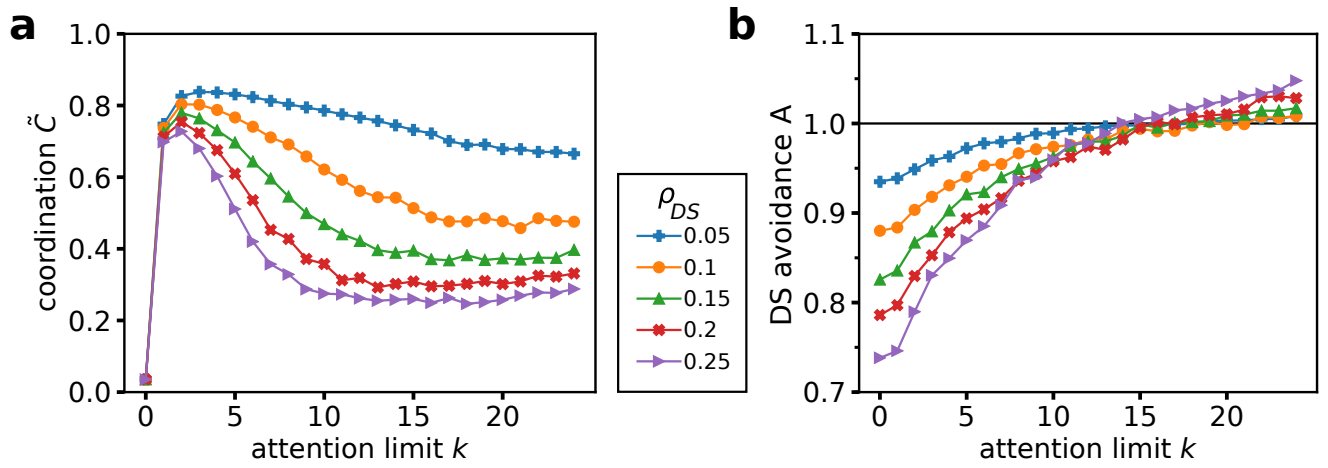

FIG. S7. Emergence of global order in the system with no informed individuals,  $R_{inf} = 0$ . **a**: Coordination  $\tilde{C}$  (directional order) versus attention limit  $k$  for different DS densities. **b**: DS avoidance versus attention limit  $k$ .  $A = 1$  corresponds to non-interacting agents. The qualitative behavior with a coordination-responsiveness trade-off is similar to the model with informed individuals, but here instead of a specific direction, the emergent consensus direction is random (spontaneous symmetry breaking).
