# Supplementary material for: Flocking in complex environments—Attention trade-offs in collective information processing
Source: PubMed Central journal article supplement (PMC7173936; doi:10.1371/journal.pcbi.1007697), 2020-04-06
Supplement: pcbi.1007697.s013.pdf [file pcbi.1007697.s013.pdf]

SUPPLEMENTARY FIGURE 8

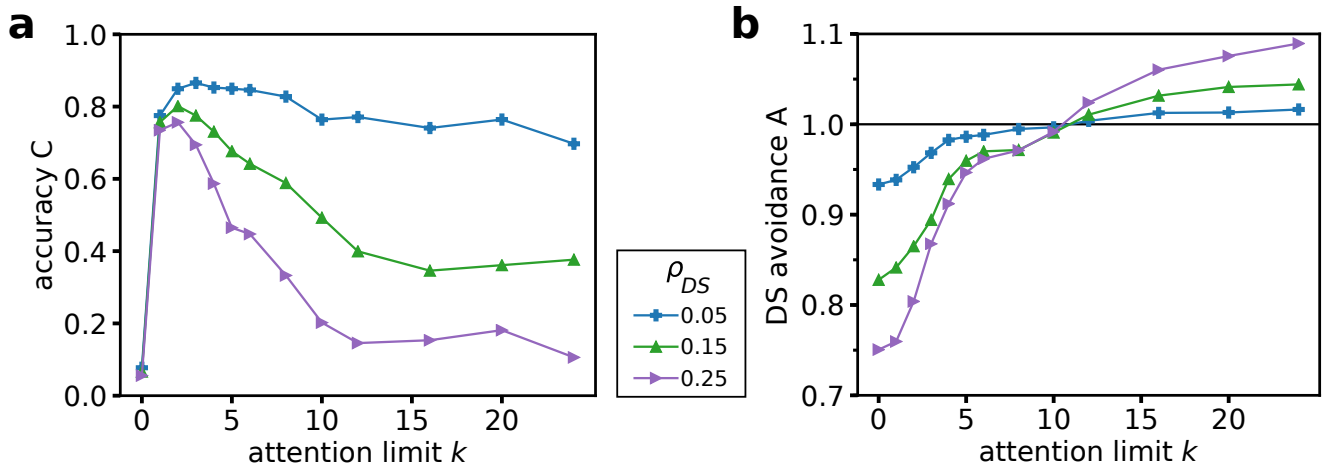

FIG. S8. Collective motion of agents with Voronoi-based kNN interaction network. Here,  $k$  nearest agents are selected from first shell of Voronoi neighbors. If the number of neighbors in first layer is smaller than  $k$ , then depending on  $k$ , the second Voronoi shell is considered. It is defined by the Voronoi neighborhood of the (direct) Voronoi neighbors of the focal agent. Accuracy  $C$  (a) and DS avoidance  $A$  (b) versus attention limit  $k$  at  $R_{inf} = 0.1$ .
