# Supplementary material for: Flocking in complex environments—Attention trade-offs in collective information processing
Source: PubMed Central journal article supplement (PMC7173936; doi:10.1371/journal.pcbi.1007697), 2020-04-06
Supplement: pcbi.1007697.s014.pdf [file pcbi.1007697.s014.pdf]

SUPPLEMENTARY FIGURE 9

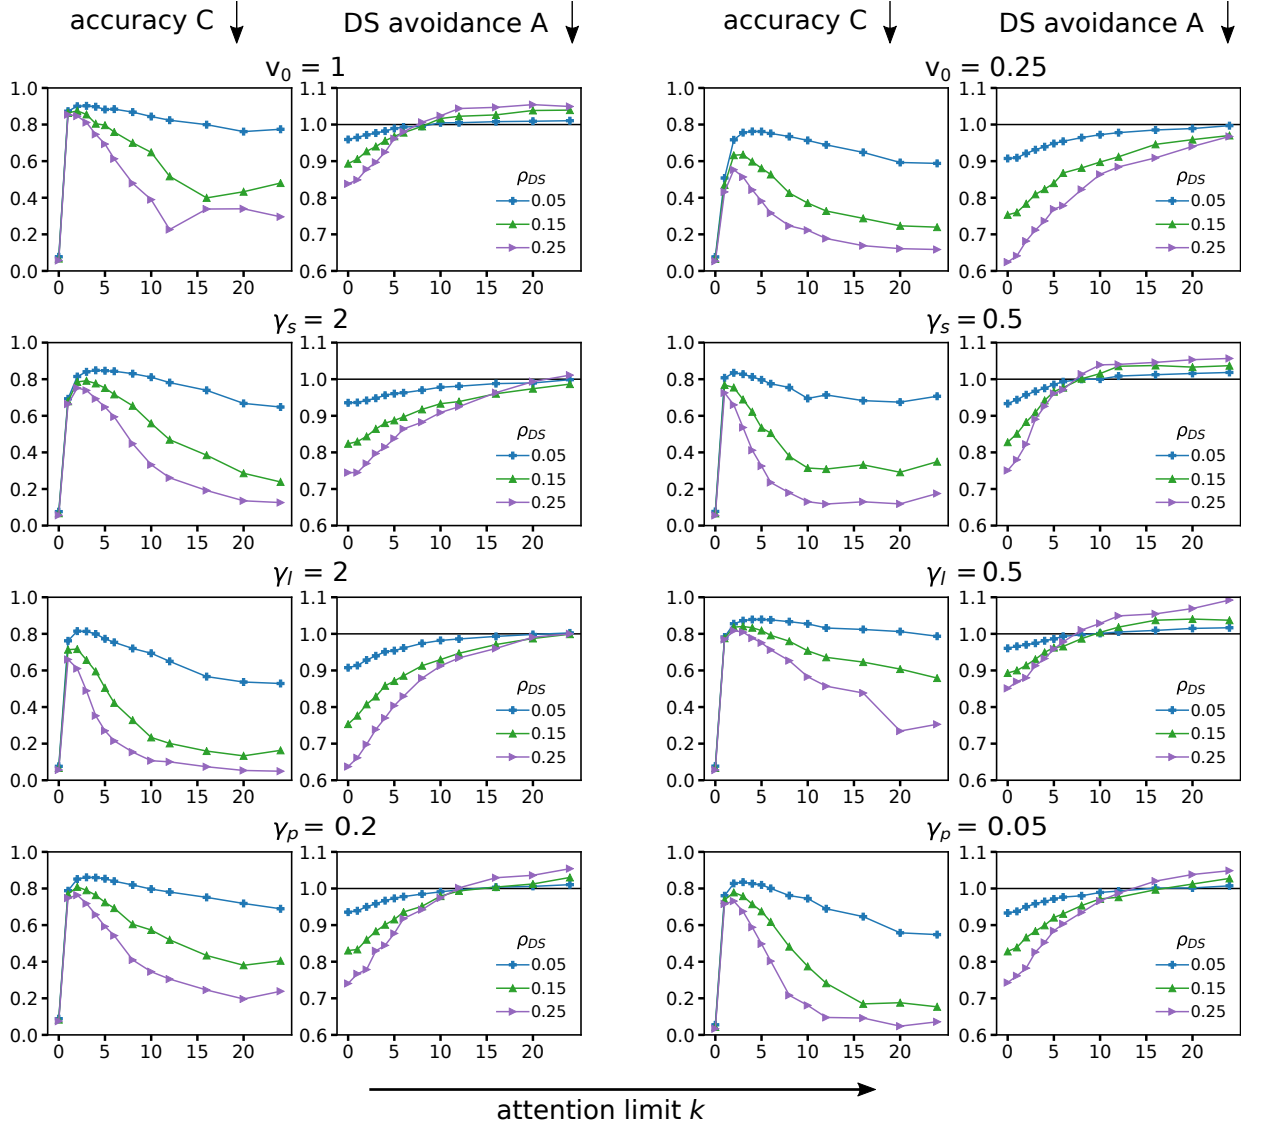

FIG. S9. Robustness of the general results for  $C$  and  $A$  vs  $k$  with respect to variation of model parameters. The panels show results for changing individual model parameters by a factor of 2 (left columns) and 0.5 (right columns). Different rows represent variation of different parameters, from top to bottom:  $v_0$ ,  $\gamma_s$ ,  $\gamma_l$ ,  $\gamma_p$ . The non-varied parameters are always set to the default parameters:  $v_0 = 0.5$ ,  $\gamma_s = 1$ ,  $\gamma_l = 1$ ,  $\gamma_p = 0.1$ .
